# Supplementary material for: Auditory selective attention is enhanced by a task-irrelevant temporally coherent visual stimulus in human listeners
Source: eLife. 2015 Feb 5;4:e04995. doi: 10.7554/eLife.04995 (PMC4337603; doi:10.7554/eLife.04995)
Supplement: Figure 2—source data 1. — Raw performance data for each subject for each of the panels in Figure 2. The data are in plaintext CSV format and can be opened with any text or spreadsheet editor. See ‘Materials and methods’ for specific descriptions of how each category was calculated. DOI: http://dx.doi.org/10.7554/eLife.04995.008 [file elife04995s001.csv]

experiment	dprime_target	dprime_masker	dprime_neither	bias_target	bias_masker	bias_neither	hitrate_target	hitrate_masker	hitrate_neither	falsealarm_target	falsealarm_masker	falsealarm_neither	visualhit_target	visualhit_masker	visualhit_neither
pitch	1.0054	1.005	1.4877	0.46723	0.35174	0.87972	51.562	56.25	56.25	15.625	18.75	7.8125	100	96.875	96.875
pitch	1.7014	1.6345	1.4055	0.41873	0.34764	0.55385	73.438	73.438	62.5	12.5	14.062	12.5	71.875	65.625	65.625
pitch	3.4261	2.8596	3.2403	0.55957	0.74588	-0.22831	95.312	89.062	96.875	1.5625	3.125	4.6875	96.875	96.875	93.75
pitch	3.4139	2.682	2.1562	1.5676	0.25002	0.3658	90.625	90.625	82.812	0	6.25	9.375	100	96.875	87.5
pitch	1.9499	1.8817	1.9804	0.89549	1.4109	1.108	70.312	57.812	67.188	6.25	3.125	4.6875	93.75	100	100
pitch	2.7874	3.1335	2.3026	0.82761	1.8781	0.4234	87.5	84.375	84.375	3.125	0	7.8125	100	100	90.625
pitch	2.3488	1.572	1.9956	0.88153	0.28519	0.4988	79.688	73.438	78.125	4.6875	15.625	9.375	96.875	96.875	93.75
pitch	2.0642	1.3017	2.1268	-0.13354	0	0.071084	87.5	75	85.938	15.625	25	12.5	93.75	96.875	84.375
pitch	1.7285	1.8523	2.4022	0.52665	0.59568	0.83742	71.875	73.438	81.25	10.938	9.375	4.6875	90.625	100	87.5
pitch	1.8073	1.4456	1.5275	0.62187	0.54067	0.50873	71.875	64.062	67.188	9.375	12.5	12.5	100	96.875	100
pitch	0.71741	1.0054	0.99197	0.3944	0.46723	0.52968	42.188	51.562	48.438	17.188	15.625	14.062	75	71.875	71.875
pitch	3.2403	2.6031	2.5829	0.22831	0.34524	-0.1129	95.312	89.062	92.188	3.125	6.25	9.375	100	100	96.875
pitch	3.2403	3.3106	3.0453	0.22831	0.7319	1.0771	95.312	93.75	89.062	3.125	1.5625	1.5625	100	100	100
pitch	0.52855	0.6849	1.0054	-0.17987	-0.31275	-0.46723	73.438	79.688	84.375	53.125	54.688	48.438	84.375	78.125	90.625
pitch	2.4748	2.185	1.7022	2.2984	1.7127	1.1892	62.5	62.5	56.25	0	1.5625	4.6875	93.75	81.25	68.75
pitch	1.106	0.92943	0.79427	0.52752	0.46723	0.40613	53.125	48.438	45.312	14.062	15.625	17.188	87.5	90.625	93.75
timbre	2.384	1.4363	1.8027	1.3752	0.58113	1.2751	73.077	62.308	57.692	3.8462	13.077	5.3846	74.242	71.212	80.303
timbre	1.0248	0.89592	0.82721	0.20378	0.19215	0.24622	62.308	59.231	54.615	23.846	25.385	23.846	86.364	92.424	83.333
timbre	1.4319	1.3975	1.4756	0.6908	0.81447	0.80236	59.231	54.615	57.692	11.538	10	10	98.485	98.485	98.485
timbre	1.4074	1.2815	1.4909	0.4917	0.36703	0.45865	63.846	63.846	66.923	14.615	17.692	14.615	62.121	53.03	53.03
timbre	1.1606	0.87779	1.4963	0.40255	0.28348	0.26782	59.231	54.615	71.538	17.692	22.308	17.692	98.485	95.455	83.333
timbre	0.96129	0.92353	0.79214	0	-0.099204	0.033048	68.462	71.538	63.846	31.538	36.154	33.077	83.333	77.273	77.273
timbre	1.9222	1.715	1.7704	1.2447	1.0702	0.86657	62.308	59.231	65.385	5.3846	6.9231	8.4615	95.455	98.485	98.485
timbre	0.78846	0.81445	0.91671	0.24997	0.33167	0.27821	53.077	50	56.154	23.846	20.769	22.308	92.424	95.455	89.394
timbre	1.2587	1.1228	1.2043	0.93815	0.6303	0.81821	45.385	50	46.923	8.4615	13.077	10	92.424	89.394	86.364
timbre	1.5126	1.4386	1.1427	-0.35073	-0.21596	-0.3406	83.846	80.769	80.769	30	28.462	39.231	80.303	86.364	83.333
timbre	1.0611	1.1267	1.0654	0.89571	0.80919	0.48524	37.692	43.846	53.077	8.4615	10	16.154	59.091	77.273	50
timbre	1.082	1.2079	1.3143	0.41782	0.54249	0.71133	56.154	56.154	54.615	17.692	14.615	11.538	83.333	92.424	92.424
timbre	2.4618	1.4538	1.882	2.9352	1.2819	1.2565	51.538	43.846	60.769	0.76923	5.3846	5.3846	89.394	83.333	98.485
timbre	1.4363	1.4519	1.6364	0.58113	0.94189	1.0855	62.308	53.077	56.154	13.077	8.4615	6.9231	98.485	95.455	95.455
timbre	0.83499	1.128	1.4516	-0.052728	0.2825	0.29231	68.462	62.308	70	36.154	20.769	17.692	86.364	86.364	92.424
timbre	1.2866	0.87779	1.0754	0.52722	0.28348	0.24104	59.231	54.615	62.308	14.615	22.308	22.308	74.242	62.121	68.182
